# Septic shock: desperately seeking treatment

O. HUET and J. P. F. CHIN-DUSTING

Volume 126 (2014), pp. 31–39

The published affiliation of Professor Jaye P.F. Chin-Dusting was incorrect. The correct affiliations are detailed here.

Olivier HUET\*† and Jaye P.F. CHIN-DUSTING\*

\*Baker IDI Heart and Diabetes Institute, Melbourne, Victoria, Australia

†Intensive Care Unit, The Alfred Hospital, Melbourne, Victoria, Australia

In addition, the Funding section was not included. The funding information is detailed here.

O.H. was partly supported by an Alfred ICU Fellowship 2013.

The publisher would like to apologize for the above errors/omissions that occurred during the production process.
